# Supplementary material for: Progressive striatonigral degeneration in a transgenic mouse model of multiple system atrophy: translational implications for interventional therapies
Source: Springer Nature journal article supplement (doi:10.1186/s40478-017-0504-y), 2018-01-03
Supplement: MOESM1 [file 25666326]

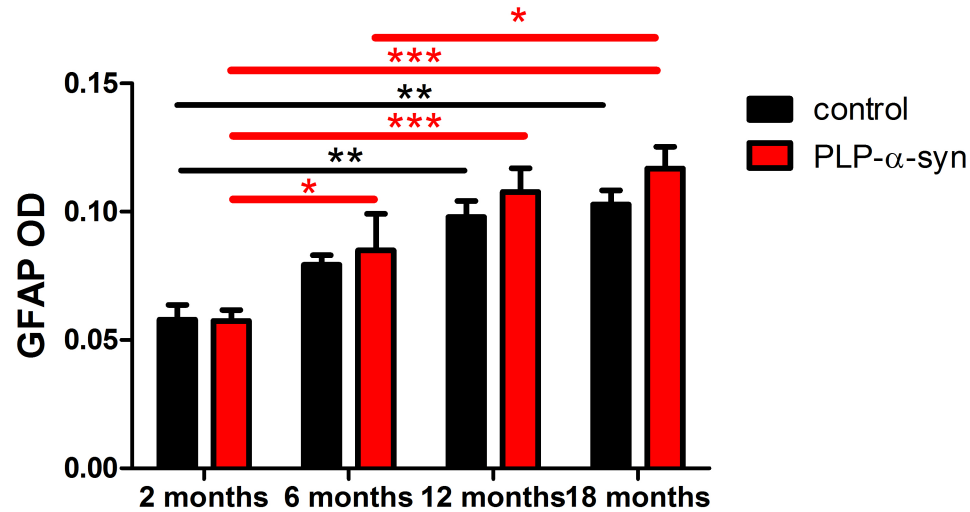

Suppl. Fig. 1. Progression of astrogliosis in control and PLP- $\alpha$ -syn mice was assessed by measuring GFAP OD. Although earlier initiation of astrogliosis, between 2 and 6 months of age, was seen in the transgenic mice, there was no significant difference between the age-matched MSA and control animals. However, a numeric increase of astrogliosis can be seen in the PLP- $\alpha$ -syn mice, suggesting that further analysis of astroglial activation may be warranted in the model in relevance to the postmortem finding in human MSA.

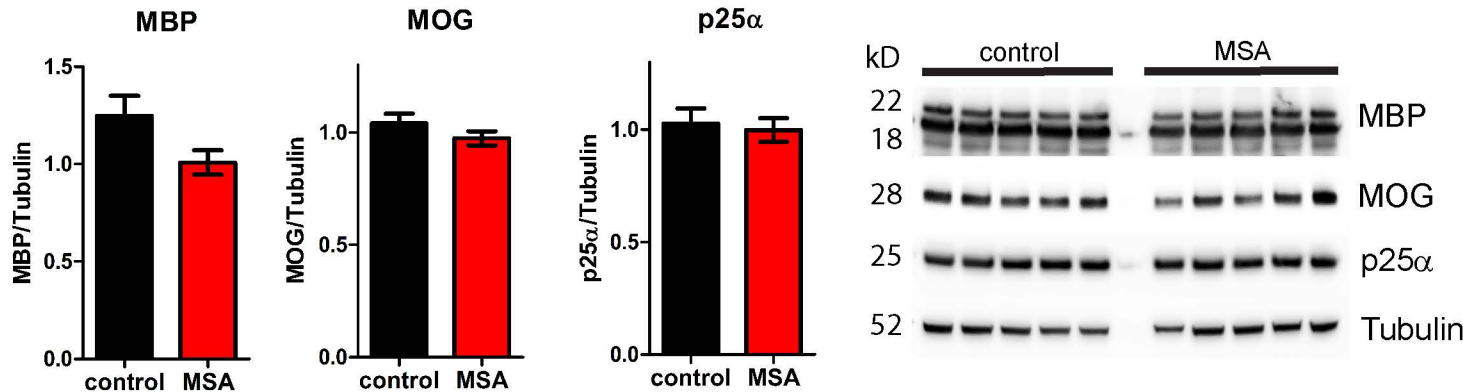

Supplementary Fig. 2. Western blot analysis does not show any major differences between control and MSA mice as of MBP, MOG and p25α protein levels at 12 months of age when the motor phenotype is detectable (unpaired t-test for MBP:  $t=1.997$ ,  $df=8$ ,  $p=0.0809$ ; unpaired t-test for MOG:  $t=1.252$ ,  $df=8$ ,  $p=0.2458$ ; unpaired t-test for p25α:  $t=0.3305$ ,  $df=8$ ,  $p=0.7495$ ).

**Supplementary Table 1.** The table represents the changes in the different subtypes of microglia (A, B, C and D) in the different brain regions. Legend: ↑↑ significant increase in MSA ( $p < 0.016$ ); ↓↓ significant decrease in MSA ( $p < 0.016$ ); ns, no significant difference. Statistical analysis was done by repeated measures ANOVA with post hoc Bonferroni test with correction for multiple comparisons.

| Microglia activation profile | Substantia nigra Control vs MSA |            | Striatum Control vs MSA |            | Pontine nuclei Control vs MSA |            | Inferior olives Control vs MSA |            |
|------------------------------|---------------------------------|------------|-------------------------|------------|-------------------------------|------------|--------------------------------|------------|
|                              | <b>2 months of age</b>          | <b>n=5</b> | <b>n=5</b>              | <b>n=5</b> | <b>n=5</b>                    | <b>n=5</b> | <b>n=4</b>                     | <b>n=4</b> |
| Type A                       | ns                              |            | ns                      |            | ns                            |            | ns                             |            |
| Type B                       | ns                              |            | ns                      |            | ns                            |            | ns                             |            |
| Type C                       | ns                              |            | ns                      |            | ns                            |            | ns                             |            |
| Type D                       | ns                              |            | ns                      |            | ns                            |            | ns                             |            |
| <b>5 months of age</b>       | <b>n=5</b>                      | <b>n=6</b> | <b>n=5</b>              | <b>n=4</b> | <b>n=4</b>                    | <b>n=4</b> | <b>n=6</b>                     | <b>n=4</b> |
| Type A                       | ↓↓                              |            | ns                      |            | ns                            |            | ns                             |            |
| Type B                       | ↑↑                              |            | ns                      |            | ns                            |            | ns                             |            |
| Type C                       | ns                              |            | ns                      |            | ns                            |            | ns                             |            |
| Type D                       | ↑↑                              |            | ns                      |            | ns                            |            | ns                             |            |
| <b>15 months of age</b>      | <b>n=4</b>                      | <b>n=4</b> | <b>n=5</b>              | <b>n=5</b> | <b>n=6</b>                    | <b>n=4</b> | <b>n=5</b>                     | <b>n=4</b> |
| Type A                       | ↓↓                              |            | ns                      |            | ns                            |            | ns                             |            |
| Type B                       | ns                              |            | ns                      |            | ns                            |            | ns                             |            |
| Type C                       | ↑↑                              |            | ns                      |            | ns                            |            | ns                             |            |
| Type D                       | ns                              |            | ↑↑                      |            | ns                            |            | ns                             |            |

**Supplementary Table 2.** The table represents the concentrations of the different cytokines and chemokines measured in the brains of control and MSA mice at 2, 5 and 15 months of age by an immunoassay. Data are presented as mean±SD.

| age                   | 2 months        |                   | 5 months       |                   | 15 months      |                   |
|-----------------------|-----------------|-------------------|----------------|-------------------|----------------|-------------------|
| genotype              | control         | PLP- $\alpha$ Syn | control        | PLP- $\alpha$ Syn | control        | PLP- $\alpha$ Syn |
| n                     | 4               | 4                 | 4              | 4                 | 4              | 4                 |
| TNF- $\alpha$         | 8.63 ± 0.69     | 6.56 ± 0.24       | 8.38 ± 0.68    | 7.05 ± 0.32       | 8.59 ± 0.14    | 7.73 ± 0.5        |
| ENA-78 / CXCL5        | 99.05 ± 19.92   | 103.16 ± 24.93    | 98.24 ± 15.34  | 91.12 ± 23.15     | 64.22 ± 3.34   | 72.61 ± 1.96      |
| Eotaxin               | 41.44 ± 4.89    | 36.66 ± 2.94      | 40.85 ± 7.83   | 42.68 ± 6.61      | 45.8 ± 1.92    | 84.45 ± 72.67     |
| G-CSF                 | 3.37 ± 0.48     | 2.59 ± 0.39       | 3.19 ± 0.43    | 2.95 ± 0.66       | 3.17 ± 0.39    | 2.62 ± 0.31       |
| GM-CSF                | nd              | nd                | nd             | nd                | nd             | nd                |
| GRO- $\alpha$ / CXCL1 | nd              | nd                | nd             | nd                | nd             | nd                |
| INF- $\alpha$         | nd              | nd                | nd             | nd                | nd             | nd                |
| INF- $\gamma$         | 6.38 ± 0.8      | 5.07 ± 0.22       | 5.7 ± 0.47     | 4.86 ± 0.15       | 5.19 ± 0.21    | 4.61 ± 0.3        |
| IL-1 $\alpha$         | 9.05 ± 1.94     | 9.32 ± 1.78       | 8.55 ± 0.88    | 9.7 ± 1.63        | 7.5 ± 0.72     | 9.63 ± 0.49       |
| IL-1 $\beta$          | 31.41 ± 3.55    | 23.53 ± 1.17      | 24.85 ± 3.69   | 22.57 ± 1.92      | 20.45 ± 3.88   | 24.02 ± 1.33      |
| IL-2                  | 575.2 ± 46.69   | 417.74 ± 40.75    | 496.86 ± 49.83 | 446.2 ± 130.38    | 578.36 ± 42.01 | 418.48 ± 2.44     |
| IL-3                  | nd              | nd                | nd             | nd                | nd             | nd                |
| IL-4                  | 3.53 ± 0.41     | 2.95 ± 0.3        | 3.27 ± 0.17    | 2.93 ± 0.44       | 3.28 ± 0.31    | 2.75 ± 0.15       |
| IL-5                  | 8.5 ± 0.85      | 6.97 ± 0.6        | 8.06 ± 1.38    | 7.85 ± 1.78       | 8.41 ± 0.66    | 7.21 ± 0.25       |
| IL-6                  | 12.65 ± 1.8     | 10.68 ± 0.68      | 11.83 ± 2.44   | 15.8 ± 7.49       | 11.2 ± 1.6     | 13.03 ± 1.54      |
| IL-9                  | nd              | nd                | nd             | nd                | nd             | nd                |
| IL-10                 | 54.15 ± 10.31   | 37.38 ± 5.13      | 46.01 ± 5.84   | 40.75 ± 5.13      | 49.26 ± 7.78   | 42.75 ± 4         |
| IL-12p70              | 4.75 ± 0.72     | 3.82 ± 0.21       | 4.22 ± 0.26    | 3.78 ± 0.22       | 3.97 ± 0.13    | 3.54 ± 0.23       |
| IL-13                 | 7.67 ± 0.65     | 6.48 ± 0.23       | 6.86 ± 0.64    | 5.99 ± 0.25       | 6.58 ± 0.55    | 6.46 ± 0.28       |
| IL-15                 | 3.99 ± 0.21     | 3.43 ± 0.48       | 4.29 ± 1.03    | 3.78 ± 0.72       | 3.73 ± 0.45    | 3.21 ± 0.43       |
| IL-17a                | 16.15 ± 3.12    | 10.67 ± 1.94      | 16.55 ± 1.84   | 12.73 ± 2.9       | 20.22 ± 7.63   | 14.68 ± 3.48      |
| IL-18                 | 173.91 ± 6.21   | 152.39 ± 7.2      | 169.17 ± 6.14  | 152.92 ± 7.28     | 165.82 ± 5.72  | 142.84 ± 7.23     |
| IL-22                 | 29.21 ± 7.83    | 21.89 ± 1.97      | 41.7 ± 15.21   | 20.85 ± 3.66      | 41.41 ± 15.3   | 21.54 ± 3.95      |
| IL-23                 | 172.91 ± 174.21 | 134.83 ± 28.13    | 137.26 ± 31.04 | 114.03 ± 65.19    | 192.79 ± 61.54 | 150.53 ± 8.84     |

| age                   | 2 months             |                    | 5 months            |                     | 15 months           |                    |
|-----------------------|----------------------|--------------------|---------------------|---------------------|---------------------|--------------------|
| genotype              | control              | PLP- $\alpha$ Syn  | control             | PLP- $\alpha$ Syn   | control             | PLP- $\alpha$ Syn  |
| n                     | 4                    | 4                  | 4                   | 4                   | 4                   | 4                  |
| IL-27                 | 16.28 $\pm$ 1.34     | 13.81 $\pm$ 1.56   | 15.47 $\pm$ 0.96    | 13.28 $\pm$ 0.87    | 15.58 $\pm$ 1.1     | 12.54 $\pm$ 0.32   |
| IL-28                 | 1349.72 $\pm$ 155.24 | 1110.2 $\pm$ 88.6  | 1148.17 $\pm$ 91.55 | 1115.62 $\pm$ 154.4 | 1369.26 $\pm$ 121.6 | 1092.28 $\pm$ 15.7 |
| IL-31                 | 32.87 $\pm$ 3.12     | 27.93 $\pm$ 2.83   | 30.58 $\pm$ 0.27    | 25.95 $\pm$ 2.63    | 24.28 $\pm$ 2.24    | 23.96 $\pm$ 2.09   |
| IP-10 / CXCL10        | 31.18 $\pm$ 8.15     | 35.57 $\pm$ 11.2   | 46.07 $\pm$ 13-74   | 38.7 $\pm$ 8.02     | 87.4 $\pm$ 26.81    | 89.73 $\pm$ 32.94  |
| LIF                   | nd                   | nd                 | nd                  | nd                  | nd                  | nd                 |
| MCP-1 / CCL2          | nd                   | nd                 | nd                  | nd                  | nd                  | nd                 |
| MCP-3 / CCL7          | 134.99 $\pm$ 11.06   | 112.77 $\pm$ 10.74 | 161.68 $\pm$ 103.33 | 117.84 $\pm$ 32.41  | 407.33 $\pm$ 369.98 | 113.94 $\pm$ 14.27 |
| M-CSF                 | 47.8 $\pm$ 3.3       | 44.18 $\pm$ 5.75   | 47.7 $\pm$ 15.81    | 59.18 $\pm$ 13.17   | 41.09 $\pm$ 9.7     | 68.41 $\pm$ 25.53  |
| MIP-1 $\alpha$ / CCL3 | 6.7 $\pm$ 1.34       | 9.99 $\pm$ 1       | 7.52 $\pm$ 2.24     | 15.61 $\pm$ 6.58    | 15.88 $\pm$ 2.45    | 29.45 $\pm$ 13.52  |
| MIP-1 $\beta$         | nd                   | nd                 | nd                  | nd                  | nd                  | nd                 |
| MIP-2 / CXCL2         | 11.48 $\pm$ 2        | 9.61 $\pm$ 0.69    | 10.35 $\pm$ 0.48    | 9.69 $\pm$ 0.77     | 11.6 $\pm$ 0.99     | 11.4 $\pm$ 0.81    |
| RANTES / CCL5         | 10.77 $\pm$ 1.72     | 7.44 $\pm$ 1.3     | 11.95 $\pm$ 3.47    | 10.04 $\pm$ 1.03    | 18.98 $\pm$ 4.56    | 30.43 $\pm$ 19.01  |

| Age             | 2 months |       |   | 5 months   |       |   | 15 months  |       |   |
|-----------------|----------|-------|---|------------|-------|---|------------|-------|---|
| <b>SN</b>       |          |       |   |            |       |   |            |       |   |
| Type A          | mean     | SEM   | n | mean       | SEM   | n | mean       | SEM   | n |
| control         | 7024,2   | 458,6 | 5 | 8532,8     | 353,6 | 5 | 7046,75    | 564,4 | 4 |
| MSA             | 8951,2   | 1038  | 5 | 5035,16667 | 514,5 | 6 | 3459,5     | 220,9 | 4 |
| Type B          |          |       |   |            |       |   |            |       |   |
| control         | 4036,8   | 400,1 | 5 | 2941,6     | 807,3 | 5 | 6859,75    | 497   | 4 |
| MSA             | 4312,2   | 488,9 | 5 | 7126,16667 | 666,5 | 6 | 8565,25    | 2046  | 4 |
| Type C          |          |       |   |            |       |   |            |       |   |
| control         | 0        | 0     | 5 | 0          | 0     | 5 | 53,5       | 30,89 | 4 |
| MSA             | 55,6     | 23,05 | 5 | 1072,16667 | 321,1 | 6 | 2913,5     | 914   | 4 |
| Type D          |          |       |   |            |       |   |            |       |   |
| control         | 0        | 0     | 5 | 0          | 0     | 5 | 26,75      | 26,75 | 4 |
| MSA             | 0        | 0     | 5 | 376,333333 | 118,9 | 6 | 318        | 99,95 | 4 |
| <b>STRIATUM</b> |          |       |   |            |       |   |            |       |   |
| Type A          | mean     | SEM   | n | mean       | SEM   | n | mean       | SEM   | n |
| control         | 87714,8  | 6121  | 5 | 76105,6    | 3202  | 5 | 51746,8    | 3062  | 5 |
| MSA             | 91142    | 6232  | 5 | 56910,75   | 1076  | 5 | 45208,6    | 3303  | 5 |
| Type B          |          |       |   |            |       |   |            |       |   |
| control         | 12744,8  | 2581  | 5 | 25062,2    | 3881  | 5 | 53056,2    | 2584  | 5 |
| MSA             | 19492,2  | 4948  | 5 | 35297,5    | 4510  | 5 | 53929      | 1427  | 5 |
| Type C          |          |       |   |            |       |   |            |       |   |
| control         | 0        | 0     | 5 | 0          | 0     | 5 | 390,6      | 159,5 | 5 |
| MSA             | 428,4    | 262,3 | 5 | 133,75     | 119,6 | 5 | 1109,2     | 347,3 | 5 |
| Type D          |          |       |   |            |       |   |            |       |   |
| control         | 0        | 0     | 5 | 0          | 0     | 5 | 0          | 0     | 5 |
| MSA             | 0        | 0     | 5 | 0          | 0     | 5 | 634,2      | 207,6 | 5 |
| <b>PN</b>       |          |       |   |            |       |   |            |       |   |
| Type A          | mean     | SEM   | n | mean       | SEM   | n | mean       | SEM   | n |
| control         | 2659,8   | 473,9 | 5 | 2928,25    | 343   | 4 | 3329,33333 | 336,6 | 6 |
| MSA             | 2890     | 263,5 | 4 | 2247,75    | 207,9 | 4 | 2517,75    | 425,7 | 4 |
| Type B          |          |       |   |            |       |   |            |       |   |
| control         | 70       | 28,82 | 5 | 112,5      | 48,33 | 4 | 972,166667 | 149,1 | 6 |
| MSA             | 291,75   | 38,25 | 4 | 394,25     | 155,2 | 4 | 695,75     | 223,2 | 4 |
| Type C          |          |       |   |            |       |   |            |       |   |
| control         | 0        | 0     | 5 | 0          | 0     | 4 | 237,333333 | 38,84 | 6 |
| MSA             | 11       | 11    | 4 | 10,5       | 6,278 | 4 | 156,25     | 60,46 | 4 |
| Type D          |          |       |   |            |       |   |            |       |   |
| control         | 0        | 0     | 5 | 0          | 0     | 4 | 222,5      | 29,14 | 6 |
| MSA             | 16,75    | 16,75 | 4 | 17,5       | 12,03 | 4 | 134,5      | 56,72 | 4 |
| <b>IO</b>       |          |       |   |            |       |   |            |       |   |
| Type A          | mean     | SEM   | n | mean       | SEM   | n | mean       | SEM   | n |
| control         | 1909,5   | 88,57 | 4 | 2264,66667 | 227,6 | 6 | 3095       | 147,9 | 5 |
| MSA             | 2249     | 132,5 | 4 | 2122,75    | 164,1 | 4 | 2132       | 170,9 | 4 |
| Type B          |          |       |   |            |       |   |            |       |   |
| control         | 49       | 13,08 | 4 | 214,333333 | 54,05 | 6 | 988,6      | 67,87 | 5 |
| MSA             | 301,8    | 82,02 | 4 | 166,25     | 50,86 | 4 | 342,75     | 142   | 4 |
| Type C          |          |       |   |            |       |   |            |       |   |
| control         | 0        | 0     | 4 | 0          | 0     | 6 | 158,8      | 39,72 | 5 |
| MSA             | 45,4     | 21,69 | 4 | 21         | 15,85 | 4 | 73         | 8,756 | 4 |
| Type D          |          |       |   |            |       |   |            |       |   |
| control         | 0        | 0     | 4 | 0          | 0     | 6 | 176,2      | 42,06 | 5 |
| MSA             | 59,6     | 33,9  | 4 | 5,5        | 5,5   | 4 | 56,25      | 17,97 | 4 |

Suppl. Table 3. Numbers of microglia subtypes in different brain regions. SN, substantia nigra; PN, pontine nuclei; IO, inferior olives.
